# Supplementary material for: Effects of gas–wall partitioning in Teflon tubing and instrumentation on time-resolved measurements of gas-phase organic compounds
Source: Copernicus journal article supplement (doi:10.5194/amt-10-4687-2017), 2017-12-04
Supplement: Supplementary file 2 [file amt-10-4687-2017-supplement.zip]

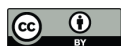

## *Supplement of*

# **Effects of gas–wall partitioning in Teflon tubing and instrumentation on time-resolved measurements of gas-phase organic compounds**

**Demetrios Pagonis et al.**

*Correspondence to:* Paul J. Ziemann ([paul.ziemann@colorado.edu](mailto:paul.ziemann@colorado.edu)) and Jose L. Jimenez ([jose.jimenez@colorado.edu](mailto:jose.jimenez@colorado.edu))

- [amt-10-4687-2017-supplement-title-page.pdf](#)
- [2017\\_Pagonis\\_AMT\\_TubingModel\\_Final.pxp](#)
- [amt-2017-279-supplement.pdf](#)

The copyright of individual parts of the supplement might differ from the CC BY 4.0 License.
